# Supplementary material
Source: PubMed Central journal article supplement (PMC3735367)
Supplement: NIHMS492116-supplement-Supplementary_Data.pdf [file NIHMS492116-supplement-Supplementary_Data.pdf]

## **A role for the root cap in root branching revealed by the non-auxin probe naxillin**

**Bert De Rybel<sup>1,2,10,\*</sup>, Dominique Audenaert<sup>1,2,\*</sup>, Wei Xuan<sup>1,2</sup>, Paul Overvoorde<sup>3</sup>, Lucia C. Strader<sup>4,11</sup>, Stefan Kepinski<sup>5</sup>, Rebecca Hoye<sup>6</sup>, Ronald Brisbois<sup>6</sup>, Boris Parizot<sup>1,2</sup>, Steffen Vanneste<sup>1,2</sup>, Xing Liu<sup>7,12</sup>, Alison Gilday<sup>8</sup>, Ian A. Graham<sup>8</sup>, Long Nguyen<sup>9</sup>, Leentje Jansen<sup>1,2</sup>, Maria Fransiska Njo<sup>1,2</sup>, Dirk Inzé<sup>1,2</sup>, Bonnie Bartel<sup>4</sup> and Tom Beeckman<sup>1,2,#</sup>**

<sup>1</sup> Department of Plant Systems Biology, VIB, Technologiepark 927, B-9052 Gent, Belgium

<sup>2</sup> Department of Plant Biotechnology and Bioinformatics, Ghent University, Technologiepark 927, B-9052 Gent, Belgium

<sup>3</sup> Department of Biology, Macalester College, St Paul, MN 55105, USA

<sup>4</sup> Department of Biochemistry and Cell Biology, Rice University, Houston, TX 77005, USA

<sup>5</sup> Centre for Plant Sciences, University of Leeds, Leeds, LS2 9JT, UK

<sup>6</sup> Department of Chemistry, Macalester College, St. Paul, MN 55105, USA

<sup>7</sup> Plant Biological Sciences Graduate Program, Department of Horticultural Science and Microbial and Plant Genomics Institute, University of Minnesota, St. Paul, Minnesota 55108

<sup>8</sup> Centre for Novel Agricultural Products, Department of Biology, University of York, York, YO10 5YW, UK

<sup>9</sup> VIB Compound Screening Facility (VIB-CSF), Technologiepark 927, B-9052 Gent, Belgium

<sup>10</sup> Present address: Laboratory of Biochemistry, Wageningen University, Dreijenlaan 3, 6703 HA Wageningen, The Netherlands

<sup>11</sup> Present address: Department of Biology, Washington University in St. Louis, St. Louis, MO 63130, USA

<sup>12</sup> Division of Biology, 156-29, California Institute of Technology, Pasadena, CA 91125

\* These authors contributed equally to this work

# Corresponding author: Tom Beeckman (Tom.Beeckman@psb.vib-ugent.be)

## SUPPLEMENTARY RESULTS

**Supplementary Table 1:** Small molecule screening data.

| Category            | Parameter                                                  | Description                                                                                                                                                           |
|---------------------|------------------------------------------------------------|-----------------------------------------------------------------------------------------------------------------------------------------------------------------------|
| Assay               | Type of assay                                              | Reporter gene assay (p <i>CYCB1;1::GUS</i> ), whole organism-based ( <i>Arabidopsis thaliana</i> )                                                                    |
|                     | Target                                                     | Phenotypic, changes in <i>CYCB1;1</i> expression pattern in root tissue                                                                                               |
|                     | Primary measurement                                        | $\beta$ -glucuronidase activity                                                                                                                                       |
|                     | Key reagents                                               | Substrate for $\beta$ -glucuronidase (X-Gluc)                                                                                                                         |
|                     | Assay protocol                                             | Described in the Methods section (Compound screening and growth conditions)                                                                                           |
|                     | Additional comments                                        |                                                                                                                                                                       |
| Library             | Library size                                               | 10000                                                                                                                                                                 |
|                     | Library composition                                        | DIVERSet; a diverse set of small synthetic molecules                                                                                                                  |
|                     | Source                                                     | ChemBridge Corporation                                                                                                                                                |
|                     | Additional comments                                        | <a href="http://www.chembridge.com/screening_libraries/diversity_libraries/index.php">http://www.chembridge.com/screening_libraries/diversity_libraries/index.php</a> |
| Screen              | Format                                                     | 96-well plate                                                                                                                                                         |
|                     | Concentration(s) tested                                    | 50 $\mu$ M                                                                                                                                                            |
|                     | Plate controls                                             | NAA, NPA                                                                                                                                                              |
|                     | Reagent/ compound dispensing system                        | Manual                                                                                                                                                                |
|                     | Detection instrument and software                          | Stereo-microscope (Ceti)                                                                                                                                              |
|                     | Assay validation/QC                                        | Qualitative assay, intraplate comparison of <i>CYCB1;1</i> expression pattern with positive (NAA) and negative (NPA) control                                          |
|                     | Correction factors                                         | n.a.                                                                                                                                                                  |
|                     | Normalization                                              | n.a.                                                                                                                                                                  |
| Additional comments | Screening performed at the VIB Compound Screening Facility |                                                                                                                                                                       |
| Post-HTS analysis   | Hit criteria                                               | <i>CYCB1;1::GUS</i> expression in the primary root                                                                                                                    |
|                     | Hit rate                                                   | 0.88%                                                                                                                                                                 |
|                     | Additional assay(s)                                        | Root phenotypic analysis                                                                                                                                              |
|                     | Confirmation of hit purity and structure                   | Compounds were repurchased (ChemBridge Corporation)                                                                                                                   |
|                     | Additional comments                                        | Only non-auxin-like hits were retained for further analysis                                                                                                           |

**Supplementary Table 2:** Overview of the primers used (5' to 3').

| mapping nar1/ibr3  |                                                                          |
|--------------------|--------------------------------------------------------------------------|
| F22F7-FOR          | GCTTCATATTGTCACCCACATTAATTC                                              |
| F22F7-REV          | AACCCCTGAACTCTGCAAC                                                      |
| F2O10-FOR          | TTGGTTATGTAGGGTTTGAT                                                     |
| F2O10-REV          | TTGGTAGATAATGTGAAACCA                                                    |
| F24P17-FOR         | CACTGCACATTGCACGAAC                                                      |
| F24P17-REV         | AGGATTTGAGGCCATTGGAT                                                     |
| F17A9-FOR          | TCCAAATTCAAAAGCCACAA                                                     |
| F17A9-REV          | TCCAGAATCTTGAACGATTTTCAT                                                 |
| T1B9-FOR           | CTTTTTATGGCCCAAATCCA                                                     |
| T1B9-REV           | CACGCTGTGTCGTTTTTCTG                                                     |
| T1B9-FOR           | TTCTTTCTCTCGCGCTCTTC                                                     |
| T1B9-REV           | TGCATCGCTGATCTAATCCTC                                                    |
| MUO22-FOR          | CCCTGCTCTTCTTGTTGTCA                                                     |
| MUO22-REV          | TGCAGCAGGATAGGTTGGT                                                      |
| T8P19-FOR          | GCATGAGAACACGCAAAAGGA                                                    |
| T8P19-REV          | TCCAGCGATAAATGTGCTGTA                                                    |
| sequencing primers |                                                                          |
| IBR3-FOR1          | CTCTGAGGAGCAGAGCGAGA                                                     |
| IBR3-REV1          | ACCTAAAGCCCGAAGCACCT                                                     |
| IBR3-FOR2          | CCGTTTTGAAATGCAGAATCA                                                    |
| IBR3-REV2          | CCTTCACTTGTTGAAGCCAAA                                                    |
| IBR3-FOR3          | GCGAGGCAATTACTGCAAAA                                                     |
| IBR3-REV3          | CTGGCATCGAAAGCATTCTC                                                     |
| IBR3-FOR4          | TTCATTTGTGTTGGCAGCATT                                                    |
| IBR3-REV4          | ATGAATCTCCCGCTTCCATC                                                     |
| IBR3-FOR5          | TCCAGAACACCCTCCATCTG                                                     |
| IBR3-REV5          | TGGAACGGTAAACAACATCAGG                                                   |
| IBR3-FOR6          | GGCCTCACGAACCTGGAGTA                                                     |
| IBR3-REV6          | TTGGGGCGTTGAAATCAGTT                                                     |
| IBR3-FOR7          | ATGGATCCCAGGTGCAGAGT                                                     |
| IBR3-REV7          | CCAACAATCGGGTTCCTTCT                                                     |
| IBR3-FOR8          | AGCGTGGAAATGGAGCTAATG                                                    |
| IBR3-REV8          | TTTGTAATAAAAGACCCAAGAACAA                                                |
| cloning primers    |                                                                          |
| pIBR10::GUS-FOR    | ggggacaagttgtacaaaaagcaggcttccaaggagatagaaccaaactctcattgt<br>cttgttgggag |
| pIBR10::GUS-REV    | ggggaccactttgtacaagaaagctgggtcaccgcctccggatcgggtgatcggag<br>gaagaagaag   |
| pIBR1::3nGFP-FOR   | TAGTTGGAATGGGTTCGAAggaagcaaatgaagtagcagatgg                              |
| pIBR1::3nGFP-REV   | TTATGGAGTTGGGTTCGAAAttcaatctttttttcttttgc                                |
| pIBR3::3nGFP-FOR   | TAGTTGGAATGGGTTCGAAccataatcctaataaactccatcc                              |
| pIBR3::3nGFP-REV   | TTATGGAGTTGGGTTCGAAgatgttcctcactctcctctatctcg                            |
| pAIM::3nGFP-FOR    | TAGTTGGAATGGGTTCGAAggagacaaaaagattaatag                                  |
| pAIM::3nGFP-REV    | TTATGGAGTTGGGTTCGAAagcttaatttctctctgatgag                                |
| pMFP2::3nGFP-FOR   | TAGTTGGAATGGGTTCGAAcctctttgacaaaccacttgagaage                            |
| pMFP2::3nGFP-REV   | TTATGGAGTTGGGTTCGAAAttcagcttcgttgagattttgcg                              |

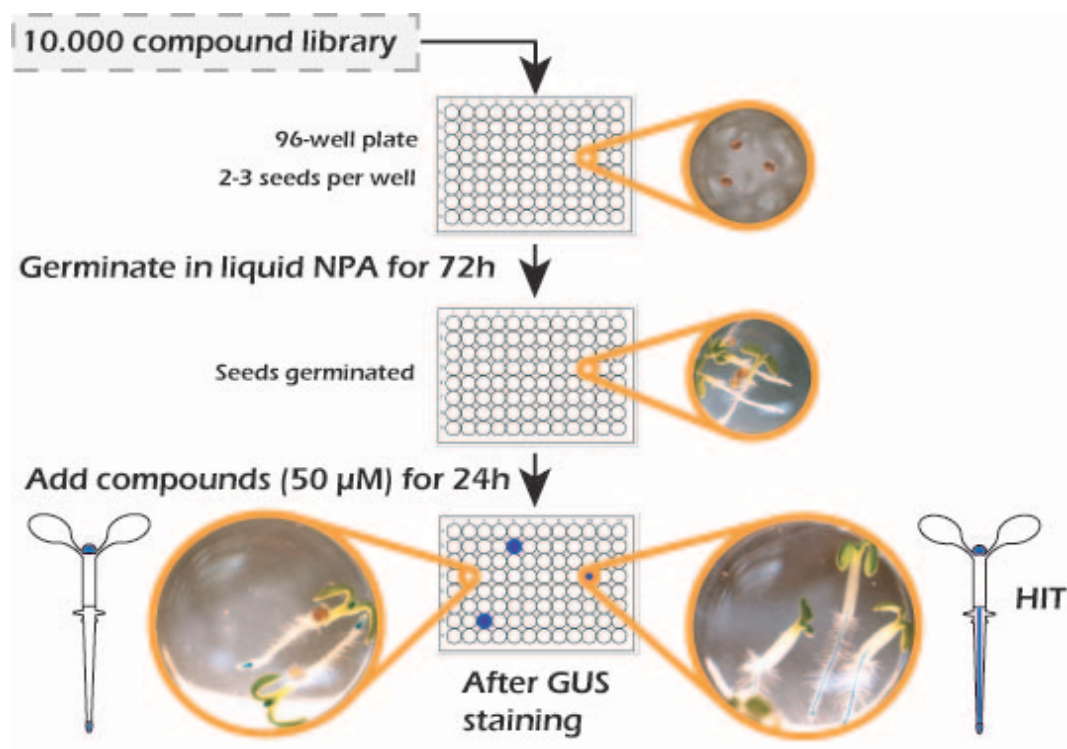

|                                                                                             |                                              |
|---------------------------------------------------------------------------------------------|----------------------------------------------|
| <b>Screening library:</b> DIVERSet, ChemBridge Corp.                                        | <b>10.000</b> compounds                      |
| <b>Primary screen:</b> pCYCB1;I::GUS activation in xylem pole pericycle of root (confirmed) | <b>99</b> compounds<br><b>(88)</b> compounds |
| <b>Secondary screen:</b> non-auxin like molecules                                           | <b>9</b> compounds                           |
| <b>Tertiary screen:</b> minimal effect on primary root growth                               | <b>2</b> compounds                           |

**Supplementary Figure 1** Overview of the procedure to screen for activators of lateral root development with the pCYCB1;I::GUS marker.



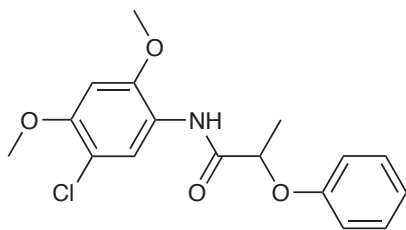

A1 - 15627285

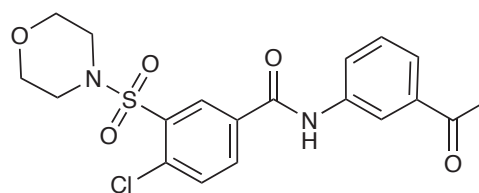

A13 - 5919797

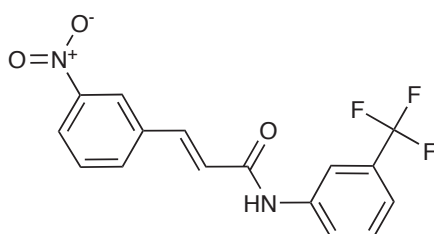

A5 - 5263355

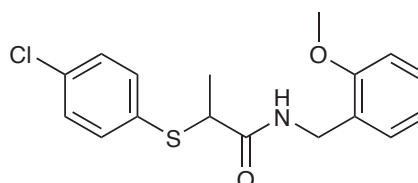

A14 - 6389571

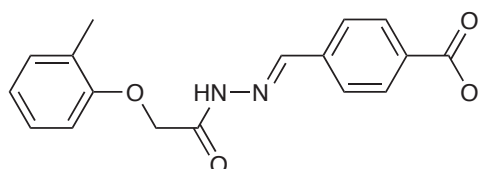

A9 - 5467678

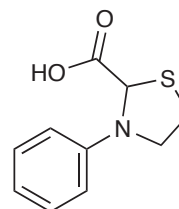

A15 - 6142645

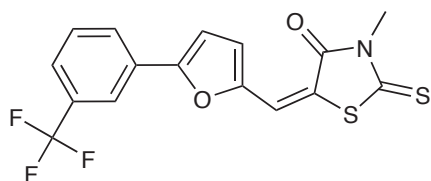

A11 - 5853934

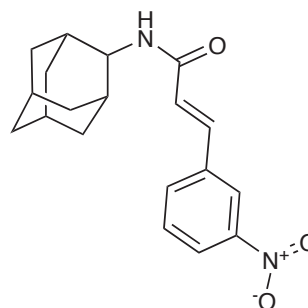

A16 - 6519229

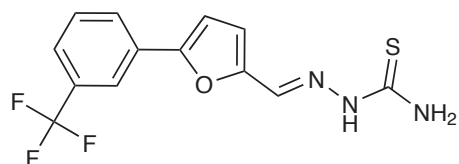

A12 - 5856819

**Supplementary Figure 2** Overview of the chemical structures of the nine hit molecules without auxin-like structure and their respective ChemBridge ID number.

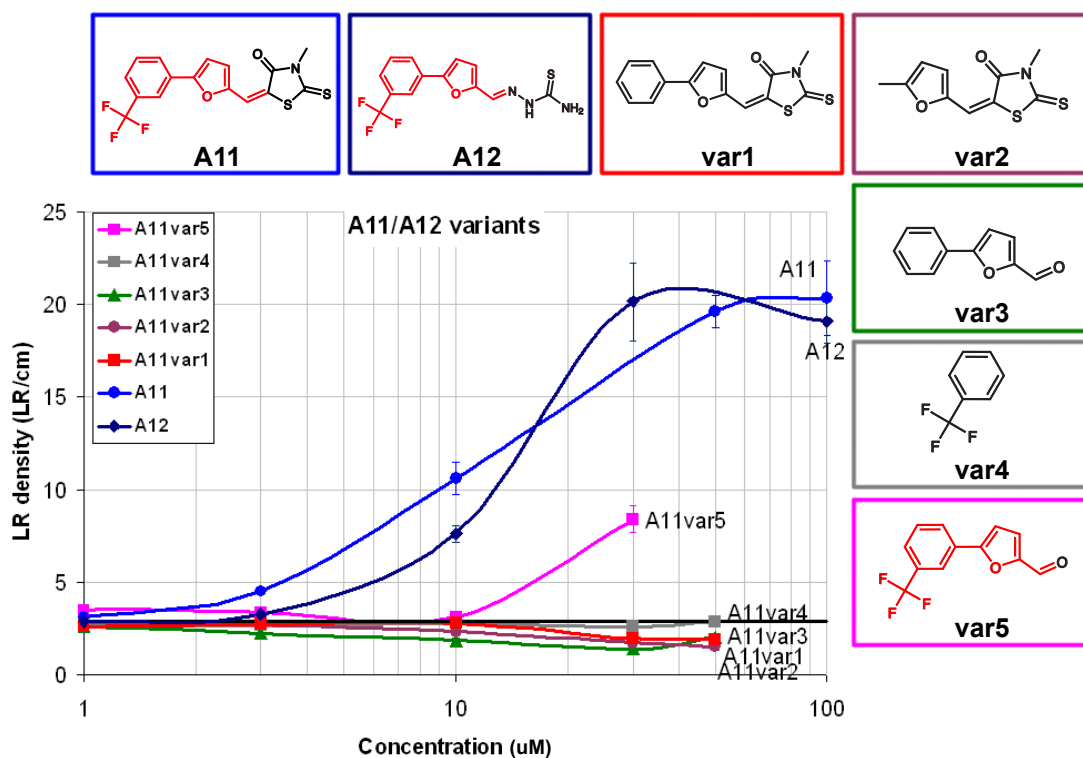

**Supplementary Figure 3** Analysis of structural variants of A11 and A12/naxillin to identify the active core structure.

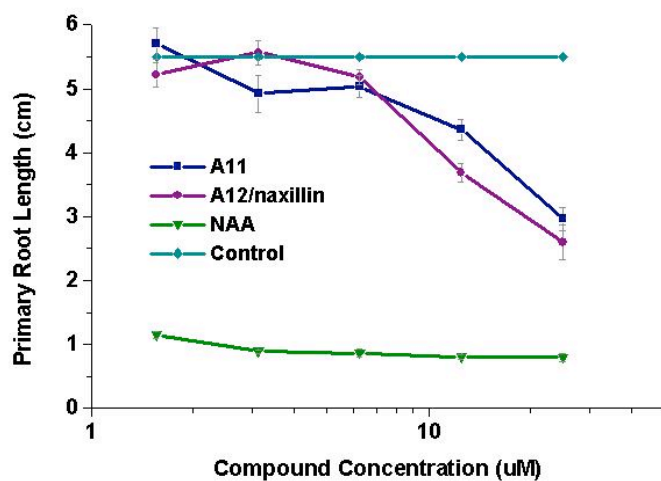

**Supplementary Figure 4** Dose-response experiment for inhibition of primary root length by A11 and A12/naxillin in comparison to NAA and mock treatment (DMSO).

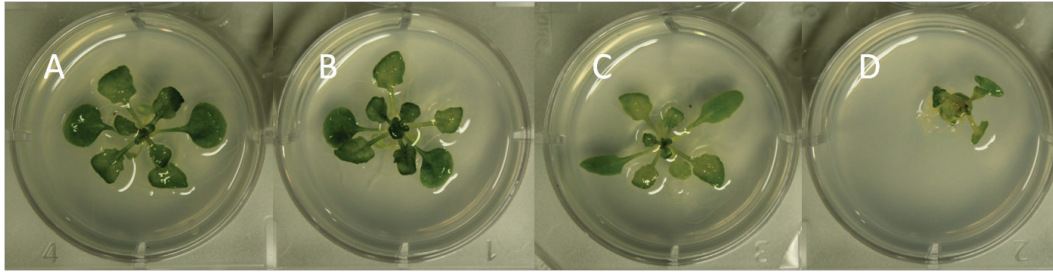

**Supplementary Figure 5** Aerial phenotype of 7-day-old seedlings treated with DMSO (mock, A), naxillin (10  $\mu$ M, B), IBA (10  $\mu$ M, C) and NAA (10  $\mu$ M, D) for five additional days.

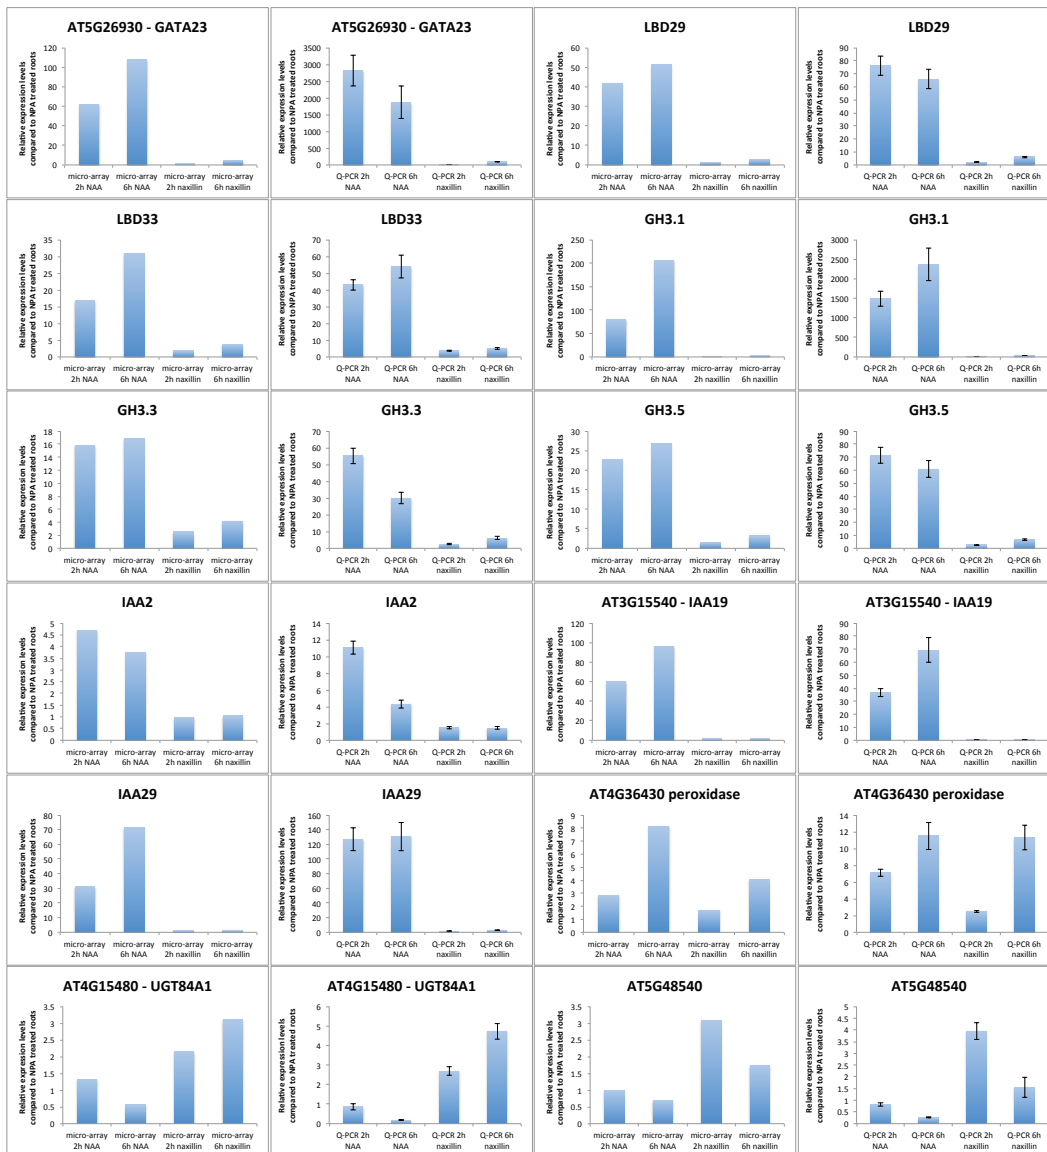

**Supplementary Figure 6** Q-RT-PCR validation (second and fourth columns) of the micro-array results (first and third columns) showing identical expression trends for all genes analyzed.

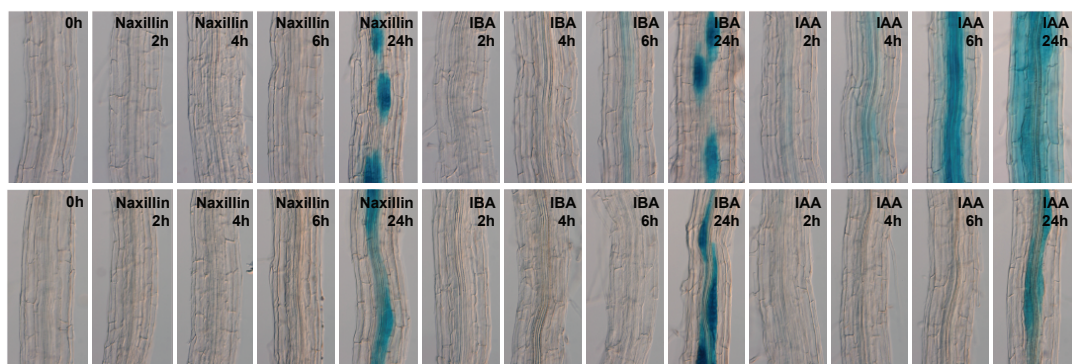

**Supplementary Figure 7** Time-course experiment on three-day-old *pDR5::GUS* (top row) and *pCYCB1;1::GUS* (bottom row) seedlings germinated on 10  $\mu\text{M}$  NPA and subsequently treated with 20  $\mu\text{M}$  naxillin, 10  $\mu\text{M}$  IBA or 10  $\mu\text{M}$  IAA for 0, 2, 4, 6 or 24 hours and subsequently stained for  $\beta$ -glucuronidase activity to assess the rate of lateral root development.

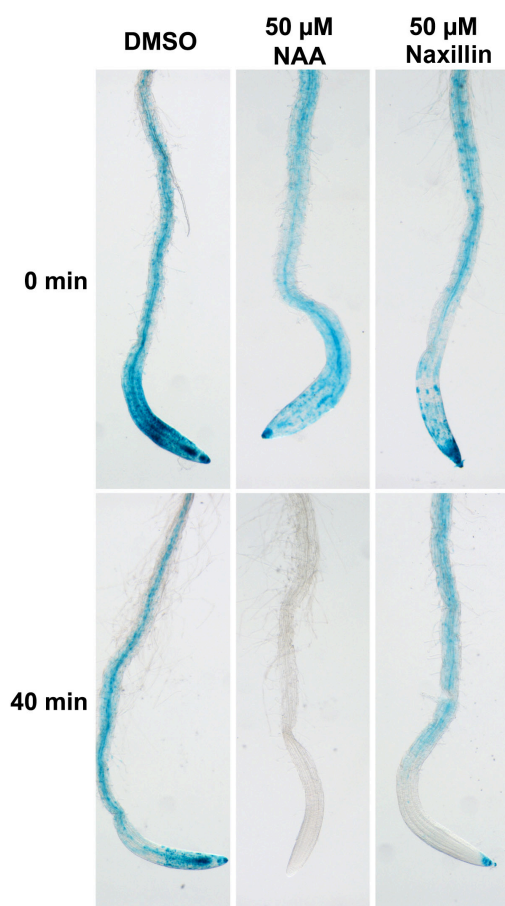

**Supplementary Figure 8** Five-day-old *pHS::AXR3-NT-GUS* plants grown on solid medium plates were heat-shocked for 2 hours at 37°C in liquid medium and then transferred to liquid medium at room temperature for 0 minutes or 40 minutes in the presence of 10  $\mu\text{M}$  NAA or 50  $\mu\text{M}$  Naxillin and subsequently stained for  $\beta$ -glucuronidase activity.

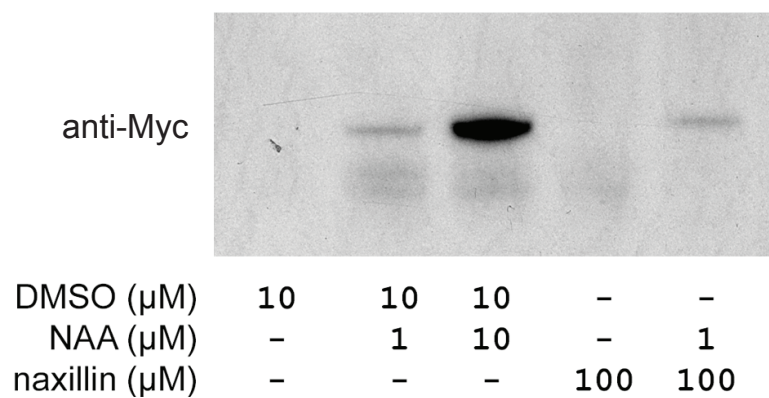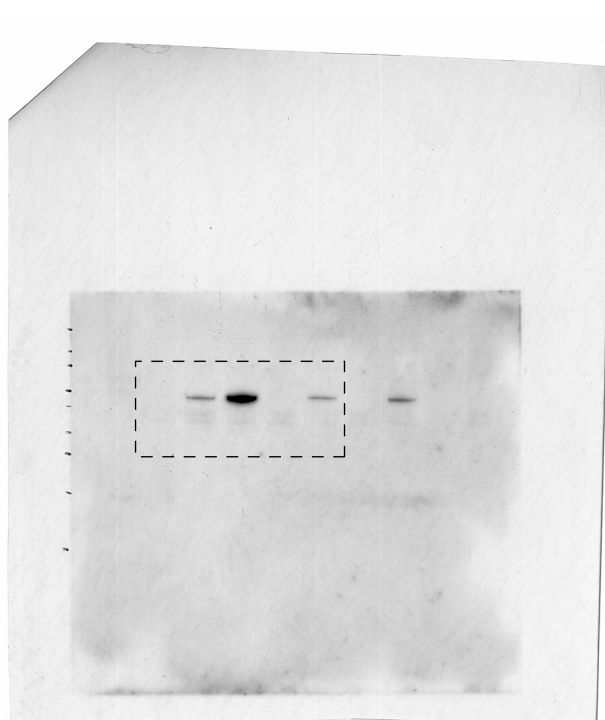

**Supplementary Figure 9** *In vitro* pull down experiment using anti-Myc antibodies with TIR1-myc protein and Aux/IAA domain II peptides in the presence of 10  $\mu\text{M}$  NAA or 100  $\mu\text{M}$  naxillin compared to DMSO treatment. Each lane is from identical aliquots of the same batch of TIR1-myc extract and the Aux/IAA peptide is pipetted in and then captured on beads (full gel is in lower panel).

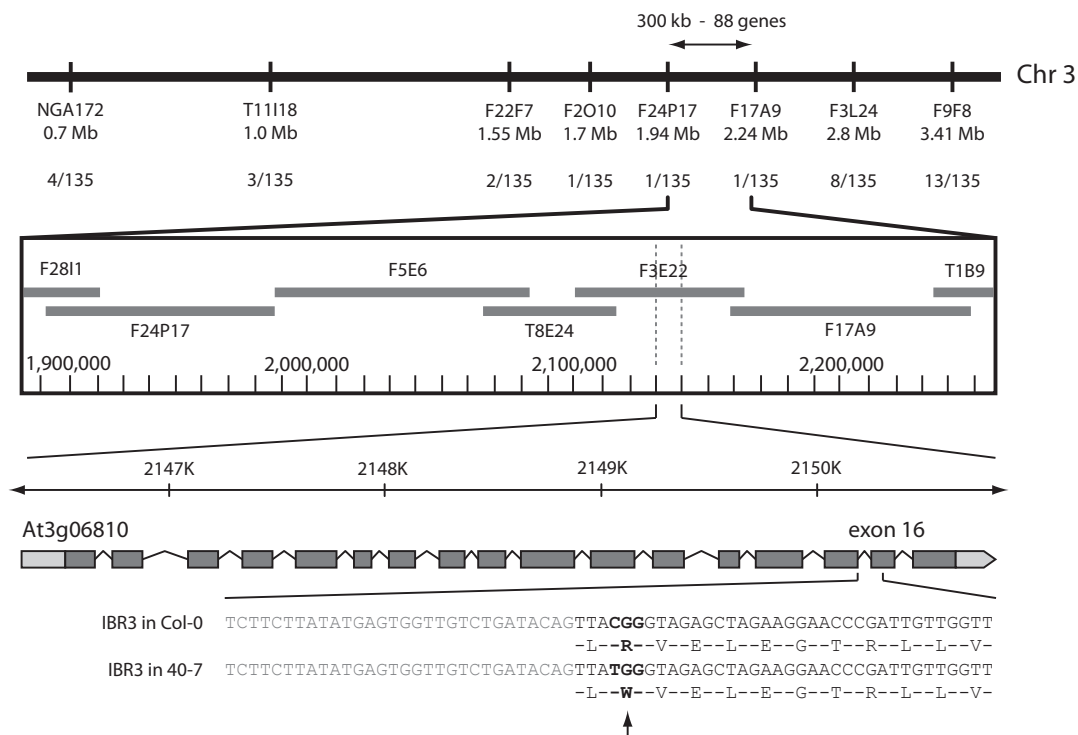

**Supplementary Figure 10** Physical map of the chromosomal region in which the mutation that causes naxillin resistance in *nar1* is located. The illustration shows the analyzed polymorphic markers, recombination frequency, BAC map of the 300 kb candidate region, genomic structure of *IBR3* and the location of the mutation.

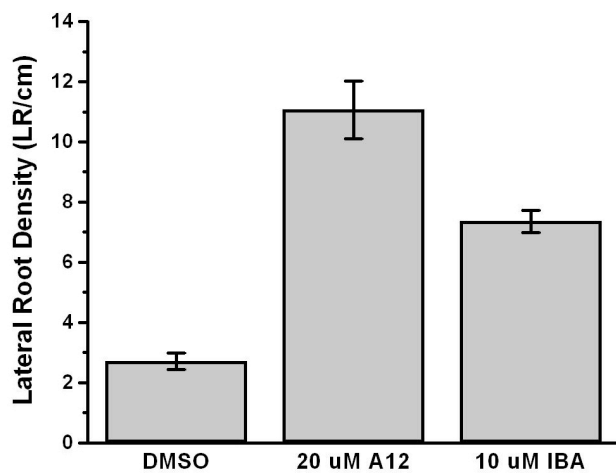

**Supplementary Figure 11** Quantification of the lateral root density of three-day-old *nar1* mutant plants complemented with p35S::*IBR3* when transferred to 20  $\mu$ M naxillin or 10  $\mu$ M IBA for five more days. Error-bars are means  $\pm$  standard errors.



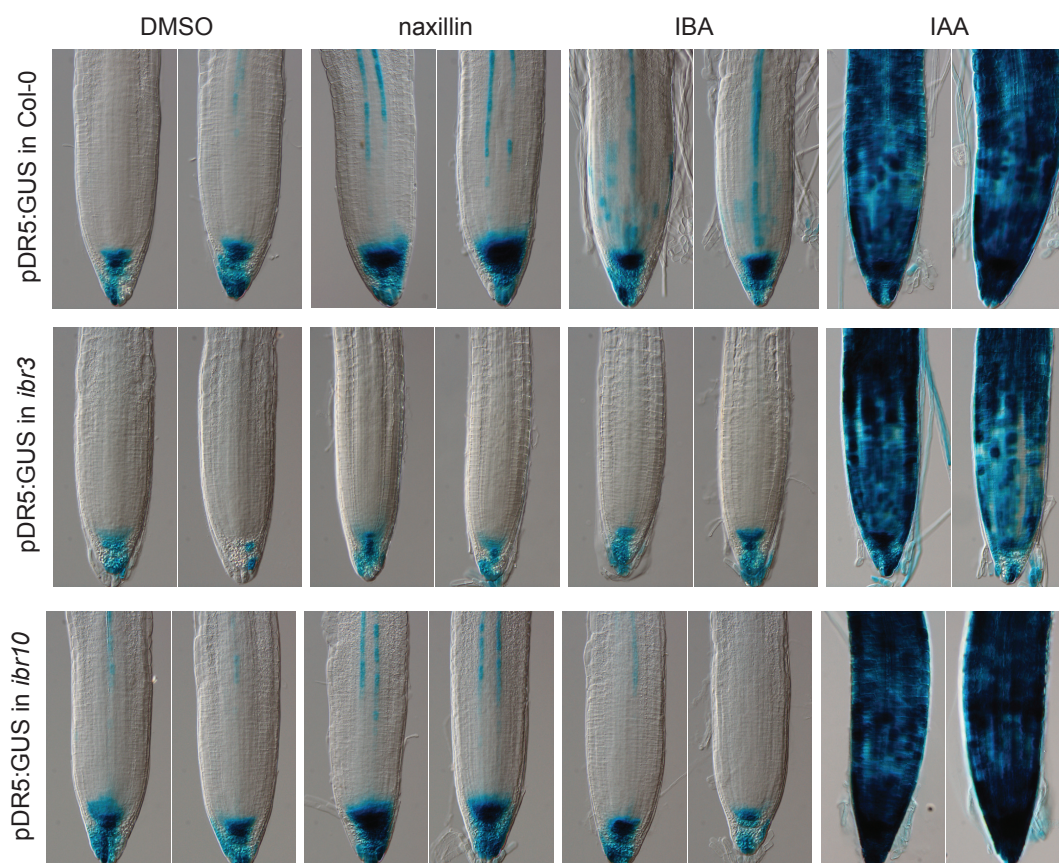

**Supplementary Figure 12** pDR5::GUS expression in root tips of WT, *ibr3* and *ibr10* mutants upon treatment with 20  $\mu$ M naxillin, 10  $\mu$ M IBA or 5  $\mu$ M IAA for 24 hours.

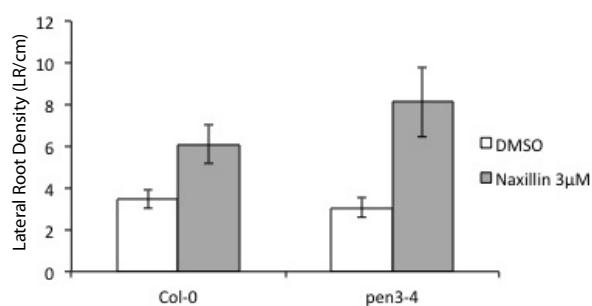

**Supplementary Figure 13** Lateral root density of WT and *pen3-4* roots treated with DMSO (mock) or naxillin showing hypersensitivity of the *pen3-4* mutant to naxillin.

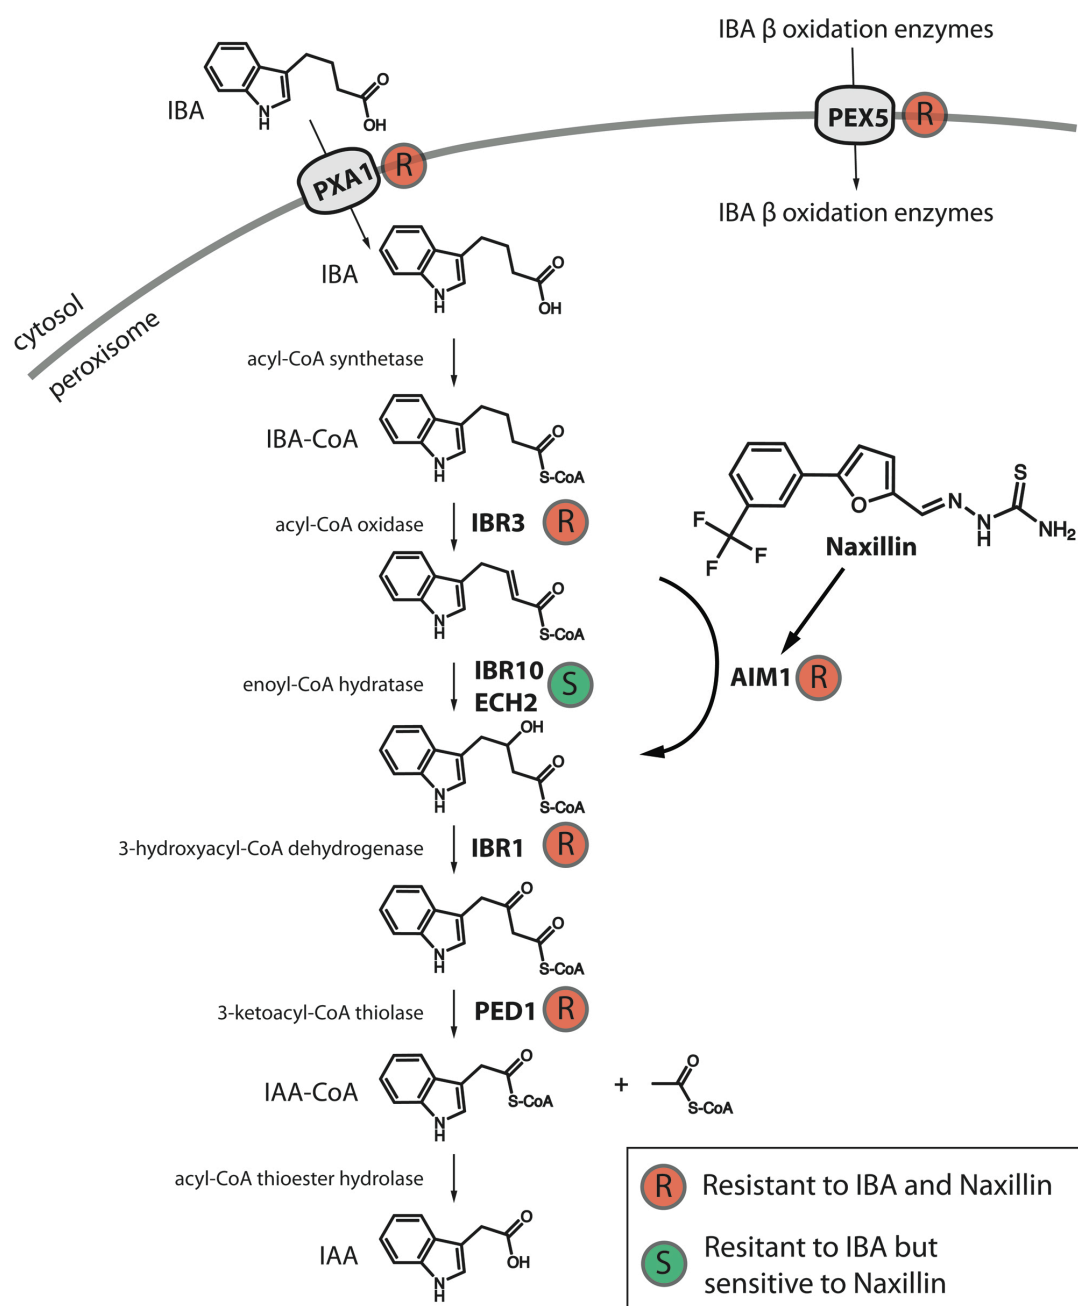

**Supplementary Figure 14** Schematic representation of the IBA-to-IAA conversion pathway. The resistance or sensitivity to IBA and/or naxillin of the mutants in the conversion enzymes involved are indicated; as well as the proposed site of action of naxillin.



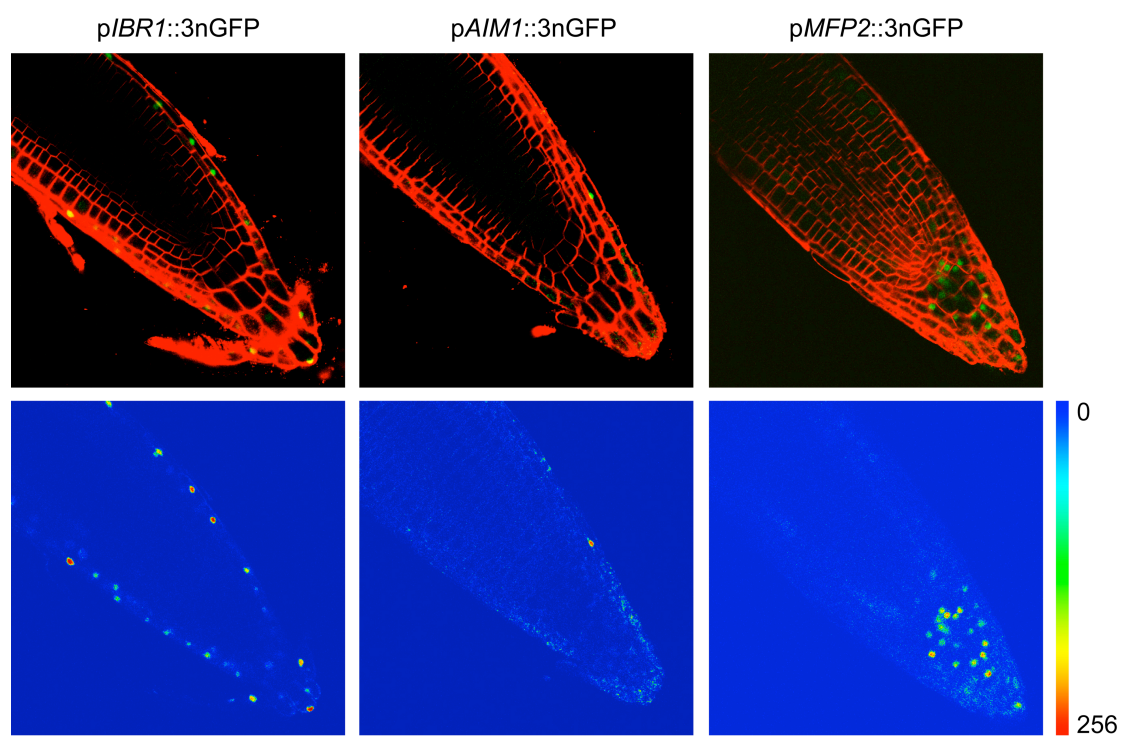

**Supplementary Figure 15** Expression patterns of *pIBR1::n3GFP*; *pAIM1::n3GFP* and *pMFP2::n3GFP*, including a false colour-scale image (below) of the GFP channel showing the high intensity in nuclei in red.

## SUPPLEMENTARY METHODS

### Microarray analysis and statistical data processing

*Arabidopsis thaliana* (L.) Heynh., Col-0 seeds were germinated vertically on solid medium derived from standard MS medium supplemented with 10  $\mu$ M NPA. Three days after germination, plants were transferred to 10  $\mu$ M NAA, 50  $\mu$ M naxillin or 10  $\mu$ M NPA (mock) for 2 and 6 hours. RNA isolation was performed on 500 root sections (only root without meristems) for each sample. All sampling points were performed in three independent experiments. RNA was extracted as described for quantitative real-time PCR below. We used 2  $\mu$ g of total RNA as input for the Affymetrix amplification; 20  $\mu$ g of amplified RNA (aRNA) was used for Affymetrix fragmentation and 15  $\mu$ g of fragmented aRNA was used to prepare the hybridization cocktail of 300  $\mu$ l. From this 300  $\mu$ l, 200  $\mu$ l was used for hybridization according to the method used in the Microarray Facility (MAF) of the VIB (<http://www.microarrays.be/>). The expression values were RMA normalized<sup>1</sup> with R ([www.r-project.org](http://www.r-project.org)) and the Bioconductor package affyGUI (<http://bioinf.wehi.edu.au/affyGUI/>) and a 2-factor Anova analysis was performed in TMEV4.0<sup>2</sup> on the raw microarray data. Genes that showed a significant (<0.05) p-value (corrected for multiple testing using BH-test) for a difference in effect of the compound (NAA or naxillin) were selected. Next, genes that had a more than 2-fold induction on naxillin for 2h or 6h time-point were selected. The selected 275 genes were clustered according to the tissue specific expression data<sup>3</sup> and those specifically expressed in the xylem pole pericycle cells (indicated by J0121 enhancer trap line)<sup>4</sup> were selected for further analysis (see **Supplementary Dataset1**).

### Calculating overrepresentation of genes in longitudinal layers

In order to get the longitudinal tissue expression values of the genes in the seedlings of *Arabidopsis thaliana*, a set of arrays L1SB to L12SB<sup>5</sup> were normalized with the robust multi-array average algorithm<sup>6</sup>. For NAA and A12 treatments, arrays were also normalized with the robust multi-array average algorithm and the fold changes and p-values were determined with the affyGUI R package<sup>7</sup> with no adjustment methods for 4 independent contrasts; NPA vs NAA and NPA vs A12, 2 and 6 hours after treatment. Affymetrix probe-sets to AGI ID assignment was done using the affy\_ATH1\_array\_elements-2010-12-20.txt file downloaded from TAIR ([www.arabidopsis.org](http://www.arabidopsis.org)). Datasets have been combined using Excel packages and “control”, “AGI no\_match” and ambiguous probe-sets were subsequently removed. Enrichment was calculated for each selected longitudinal and radial layer by addressing the percentage of experimentally observed genes satisfying a set of conditions compared to the expected number of genes which would have been observed with an independent effect of the tissue specificity and the treatment. A gene was considered as being overrepresented for a layer if its normalized expression value

in this layer compared with the mean of the normalized expression values in the other layers was above a given threshold. A gene was considered as being regulated upon a treatment if the fold change and the p-value satisfied a given threshold. The formula used to calculate the enrichment can be summarized as  $\text{Enrichment}(\%) = \frac{L\text{TObs} \times L\text{Tot} \times 100}{T\text{Tot} \times L\text{Spec}}$ ; *LTObs* being the observed number of genes both specific for a given layer and significantly regulated upon the treatment; *TTot* being the total number of genes regulated by the treatment; *LTot* being the total number of genes presenting a layer specificity; *LSpec* being the number of genes specific for the given layer. Eighteen different combinations of values for the Fold Changes and the p-value were generated to test the robustness and the coherence of the query (respectively 1, 2 or 3 for the Fold Change and 0.05 or 0.01 for the p-value) and were used to generate the histogram. The p-values were generated for each enrichment value using the Fisherexact Excel addin (<http://www.obertfamily.com/software/fisherexact.html>). The significant enrichment values (p-value > 0.05) for the 18 different combinations were averaged and a standard deviation was calculated to generate the histograms displayed.

## References to Supplemental Methods

1. Irizarry, R.A. et al. Exploration, normalization, and summaries of high density oligonucleotide array probe level data. *Biostatistics (Oxford, England)* **4**, 249-64 (2003).
2. Saeed, A.I. et al. TM4: a free, open-source system for microarray data management and analysis. *BioTechniques* **34**, 374-8 (2003).
3. Brady, S.M. et al. A high-resolution root spatiotemporal map reveals dominant expression patterns. *Science (New York, N.Y)* **318**, 801-6 (2007).
4. Laplaze, L. et al. GAL4-GFP enhancer trap lines for genetic manipulation of lateral root development in *Arabidopsis thaliana*. *J Exp Bot* **56**, 2433-42 (2005).
5. Brady, S.M. et al. A high-resolution root spatiotemporal map reveals dominant expression patterns. *Science* **318**, 801-6 (2007).
6. Irizarry, R.A. et al. Exploration, normalization, and summaries of high density oligonucleotide array probe level data. *Biostatistics* **4**, 249-64 (2003).
7. Smyth, G.K. Linear models and empirical bayes methods for assessing differential expression in microarray experiments. *Stat Appl Genet Mol Biol* **3**, Article3 (2004).
